# Supplementary material for: Divergent Effects of the N-Methyl-D-Aspartate Receptor Antagonist Kynurenic Acid and the Synthetic Analog SZR-72 on Microcirculatory and Mitochondrial Dysfunction in Experimental Sepsis
Source: Frontiers journal article supplement (doi:10.3389/fmed.2020.566582), 2020-11-27
Supplement: Data_Sheet_1.pdf [file Data_Sheet_1.pdf]

## Supplementary Data 1

### Assessment of mitochondrial respiration

Mitochondrial  $O_2$  consumption ( $JVO_2$ ; volume-specific  $O_2$  flux) was measured in liver homogenates using High-Resolution FluoRespirometry (Oxygraph-2k, Oroboros Instruments, Innsbruck, Austria). Briefly, 200–300 mg tissue samples obtained from the left lateral lobe of the liver were cut into smaller pieces, washed in phosphate-buffered saline five times and then homogenized with a Potter–Elvehjem tissue grinder in an isolation medium containing 250 mmol  $L^{-1}$  sucrose, 0.5 mmol  $L^{-1}$   $Na_2EDTA$ , 10 mmol  $L^{-1}$  Tris and 1 g  $L^{-1}$  bovine serum albumin. Calibration and measurements were performed with continuous stirring (750 rpm) at 37°C in a 2 mL Mir05 respiration medium (1,2). Chamber  $O_2$  concentration was maintained between 200 and 50  $\mu mol L^{-1}$  during the experiments. After stabilization of respiration, NADH- and  $FADH_2$ -supported LEAK respiration and complex I- and II-linked maximal capacities of oxidative phosphorylation (OXPHOS I and OXPHOS II; Supplementary Data 1 Figure A–B) were determined in the presence of substrates (LEAK<sub>GM</sub>; 10 mmol  $L^{-1}$  glutamate, 2 mmol  $L^{-1}$  malate; and LEAK<sub>S</sub>; 10 mmol  $L^{-1}$  succinate) and saturating concentration of ADP (2.5 mmol  $L^{-1}$ ). Rotenone (0.5  $\mu mol L^{-1}$ ; complex I inhibitor) was only administered prior to succinate to (a) block ROS generation via reverse electron transport and (b) prevent accumulation of oxaloacetate, a known endogenous inhibitor of complex II. Following stimulation of OXPHOS, the integrity of the outer mitochondrial membrane was tested with exogenous cytochrome c (10  $\mu mol L^{-1}$ ). ATP synthase was inhibited by oligomycin (2.5  $\mu mol L^{-1}$ ) to assess LEAK respiration in a non-phosphorylating state (LEAK<sub>Omy</sub>). Respiratory control ratio (RCR), an index of coupling between respiration and phosphorylation, was expressed as a ratio of OXPHOS to the LEAK<sub>Omy</sub> state. The electron transport system-independent respiration (or residual oxygen consumption; ROX) was evaluated following complex III inhibition with antimycin A (2.5  $\mu mol L^{-1}$ ). The DatLab software (Oroboros Instruments, Innsbruck, Austria) was used for online display, respirometry data acquisition and analysis.

### Determination of changes of the mitochondrial membrane potential

Changes in mitochondrial membrane potential ( $\Delta\Psi_{mt}$ ) were assessed in liver homogenate with a cationic fluorescent probe, safranin (Sigma Aldrich, St. Louis, Mo., USA). The probe accumulates in energized mitochondria according to the inside negative potential with a concomitant change in absorption and fluorescence (3). A Blue Fluorescence Sensor (excitation 465 nm; gain for sensor: 1000; polarization voltage: 500 mV) connected to the windows on the glass chambers and the oxygraph was used to measure safranin fluorescence according to the manufacturer's instructions ([https://wiki.orooboros.at/images/5/52/MiPNet20.13\\_Safranin\\_mt-membranepotential.pdf](https://wiki.orooboros.at/images/5/52/MiPNet20.13_Safranin_mt-membranepotential.pdf)). The dye was dissolved in distilled water (1 mmol  $L^{-1}$  stock solution), stored in dark vials and titrated into the 2 mL O2k chamber up to 2  $\mu mol L^{-1}$  of safranin final concentration. Previous data have shown that this tracer concentration does not affect complex II-linked coupled respiration (3) and fluorescence spectral changes are linearly related to  $\Delta\Psi_{mt}$  within a 0.5–2  $\mu mol L^{-1}$  concentration range. The protocol for homogenate preparation was identical with those described earlier (1,2). All the measurements were performed in a Mir05 respiration medium under continuous magnetic stirring (750 rpm) at 37°C. Stoppers were covered with black cover slips to prevent light penetrating the capillary and to avoid disruption of the fluorescence signal. Liver homogenates were energized with succinate (10 mmol  $L^{-1}$ ) after inhibition complex I with rotenone (0.5  $\mu mol L^{-1}$ ). After stabilization respiration and fluorescence, a protonophorous uncoupler, carbonyl cyanide m-chlorophenyl hydrazone (CCCP), was titrated into a respiration chamber (0.5  $\mu mol L^{-1}$  in steps) for the stepwise depolarization of  $\Delta\Psi_{mt}$ . During CCCP stimulation,  $O_2$  concentration was maintained above 50  $\mu mol L^{-1}$  to induce maximum  $O_2$  flux and to avoid the inhibitory effect of hypoxia on electron

transfer-pathway capacity. When  $\Delta\Psi_{mt}$  was collapsed after optimum concentration of CCCP, uncoupled respiration was inhibited with antimycin A (2.5  $\mu\text{mol L}^{-1}$ ; ROX). Safranin fluorescence (F) was expressed as the rate of change in fluorescent signal and average resting fluorescence using the following formula: safranin fluorescence intensity =  $\Delta F/F = (F_{LEAK} - F_{rest})/F_{rest}$ , where  $F_{LEAK}$  is the indicator of fluorescence after succinate and  $F_{rest}$  is the average fluorescence signal before the addition of substrate (Supplementary Data 1 Figure C).

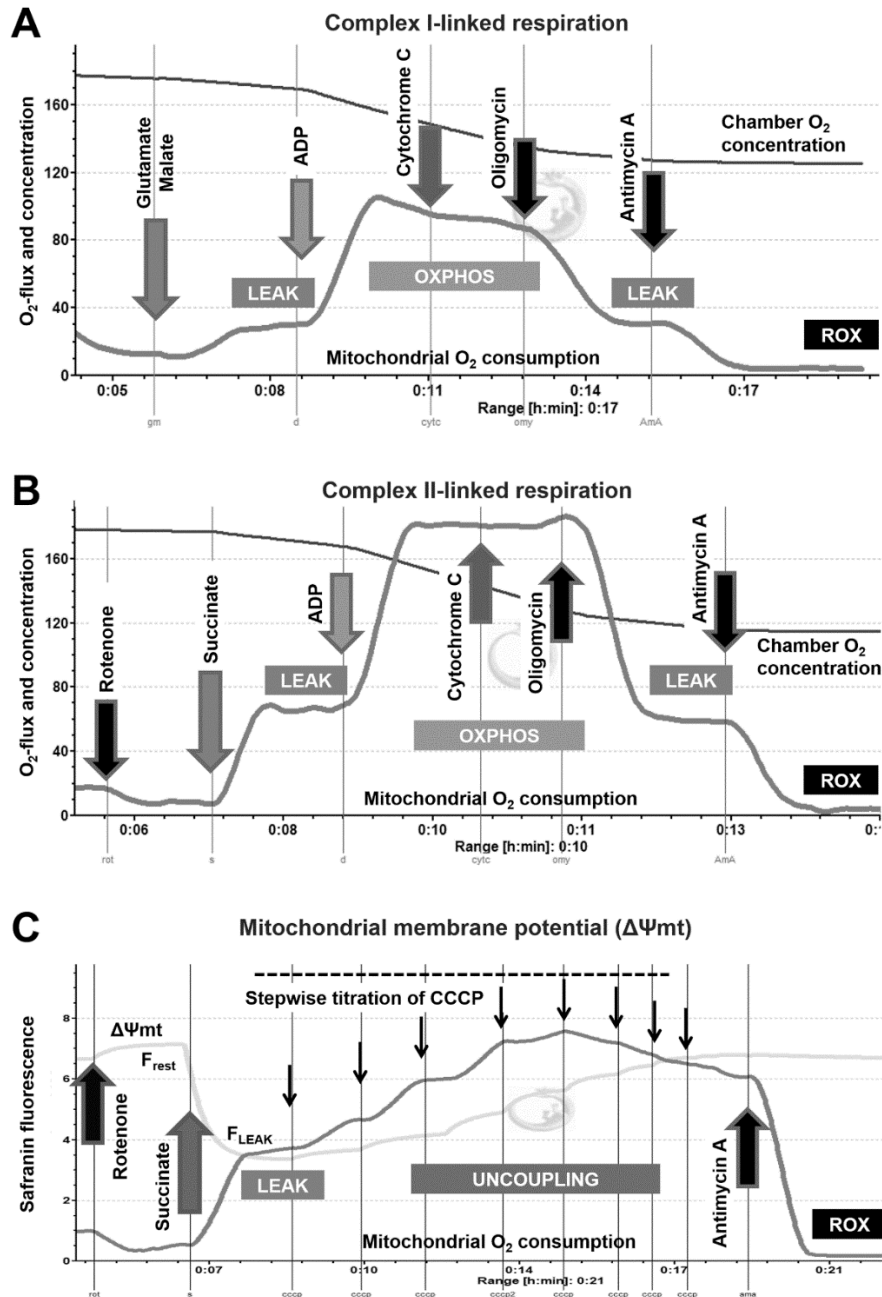

**Supplementary Data 1 Figure.** FluoRespirometric protocols. Complex I- and II-linked respiration, oxidative phosphorylation (OXPHOS) capacities (A,B) and mitochondrial membrane potential ( $\Delta\Psi_{mt}$ ; C) were assessed in energized liver homogenates. Mitochondrial electron transport system-dependent  $O_2$  consumption was confirmed by blocking complex III with antimycin A (ROX; residual oxygen consumption). Substrate- and uncoupler-induced changes in  $\Delta\Psi_{mt}$  were monitored in the presence of safranin fluorescent dye.

## REFERENCES

1. Rutai A, Fejes R, Juhász L, Tallósy SP, Poles MZ, Földesi I, Mészáros AT, Szabó A, Boros M, Kaszaki J. Endothelin A and B Receptors. Shock (2019) Online ahead of print. doi:10.1097/SHK.0000000000001414
2. Nászai A, Terhes E, Kaszaki J, Boros M, Juhász L. Ca(2+)N It Be Measured? Detection of Extramitochondrial Calcium Movement With High-Resolution FluoRespirometry. Sci Rep (2019) 9:19229 doi:10.1038/s41598-019-55618-5
3. Krumschnabel G, Eigentler A, Fasching M, Gnaiger E. Use of safranin for the assessment of mitochondrial membrane potential by high-resolution respirometry and fluorometry. Methods Enzymol (2014) 542:163–81. doi:10.1016/B978-0-12-416618-9.00009-1
